# Supplementary material for: Synthesis of highly c-axis-oriented ZnO thin films using novel laser-enhanced electrospray CVD under atmospheric pressure
Source: Royal Society of Chemistry journal article supplement (doi:10.1039/c7ce01333g), 2017-01-01
Supplement: c7ce01333g1.pdf [file c7ce01333g1.pdf]

## Supporting Information

# Synthesis of highly *c*-axis-oriented ZnO Thin Films using Novel Laser-enhanced Electrospray CVD under Atmospheric Pressure

Satoshi Suehiro<sup>a\*</sup>, Teiichi Kimura<sup>a</sup>, Daisaku Yokoe<sup>b</sup> and Seiji Takahashi<sup>a</sup>

<sup>a</sup>*Japan Fine Ceramic Center (JFCC), Materials Research and Development Laboratory,  
2-4-1 Mutuno, Atsuta-ku, Nagoya 456-8587, Japan*

<sup>b</sup>*Japan Fine Ceramic Center (JFCC), Nanostructures Research Laboratory, 2-4-1  
Mutuno, Atsuta-ku, Nagoya 456-8587, Japan*

\*Email: [s\\_suehiro@jfcc.or.jp](mailto:s_suehiro@jfcc.or.jp) [TEL:+81-52-871-3500](tel:+81-52-871-3500)

Table S1 Experimental conditions

|              |                                                  |                        |
|--------------|--------------------------------------------------|------------------------|
| Electrospray | Applied Voltage (kV)                             | 0-20                   |
|              | Flow rate ( $\mu\text{l}/\text{min}$ )           | 70                     |
|              | Nozzle size (mm)                                 | $\phi$ 0.4             |
|              | Nozzle- substrate distance                       | 60                     |
| <hr/>        |                                                  |                        |
| CVD          | Heating-stage Temperature ( $^{\circ}\text{C}$ ) | 0-500                  |
|              | Pressure (Pa)                                    | $1 \times 10^5$ (1atm) |
|              | Laser Power (W)                                  | 0-300                  |
|              | Laser spot (mm)                                  | $\phi$ 30              |

Preheating stage temperature by laser irradiation

Laser power: 80 W: stage temperature =  $\sim 120^{\circ}\text{C}$ ,

Laser power: 150 W: stage temperature =  $\sim 250^{\circ}\text{C}$ ,

Laser power: 300 W: stage temperature =  $\sim 400^{\circ}\text{C}$

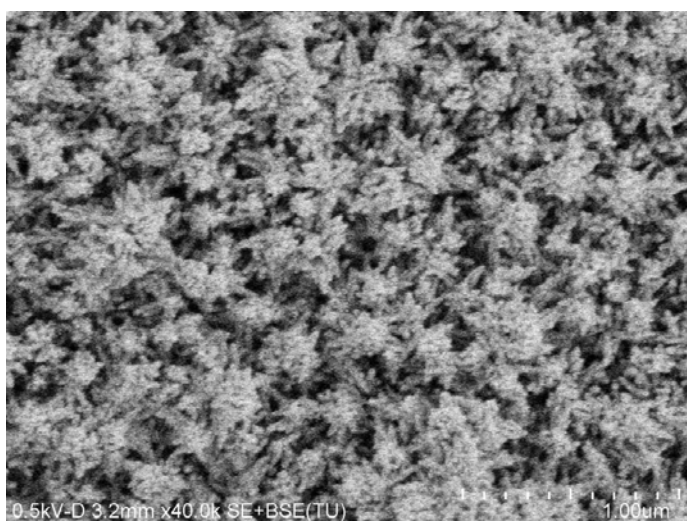

Figure S1 SEM image of surface ZnO thin films by electrospray CVD laser power at 70W

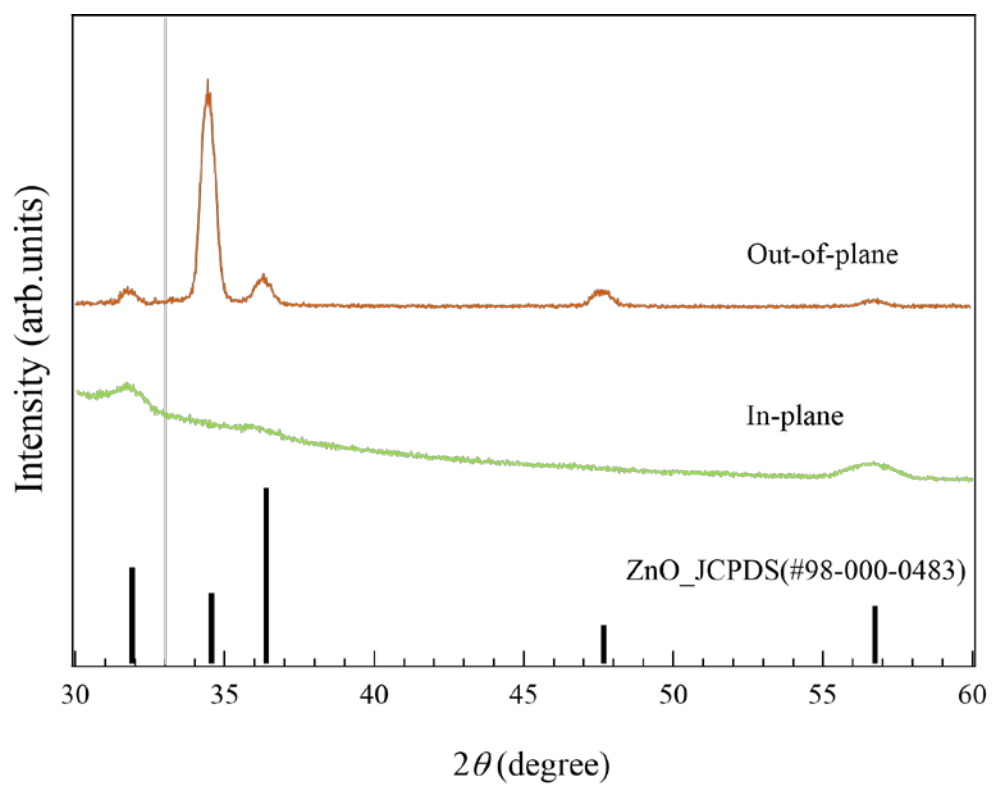

Figure S2 XRD pattern of ZnO thin films by electrospray laser CVD using acetic acid (0.1M)

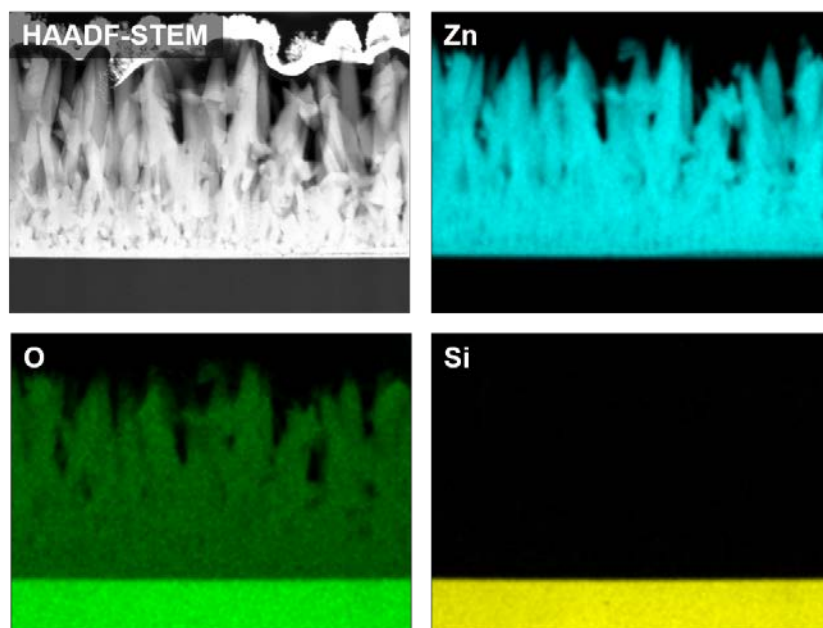

Figure S3 Cross sectional STEM image and EDS mapping of ZnO thin films by electrospray laser CVD using acetic acid(0.1M)

Table S2 Dependence of the morphology of ZnO films using various ZnO precursor solution.

| Zn precursor (0.1mol)                     | solvent  | additive                   | Laser power(W) | Morphology         | * temperature (°C) |
|-------------------------------------------|----------|----------------------------|----------------|--------------------|--------------------|
| Zn nitrate ( $\text{Zn}(\text{NO}_3)_2$ ) | ethanol  | —                          | 150            | nanoparticle       | ~210               |
| Zn acetylacetonate                        | methanol | —                          | 150            | granular           | ~370               |
| Zn acetate                                | methanol | —                          | 80             | needle-like        | ~210               |
| Zn acetate                                | methanol | glacial acetic acid (0.1M) | 80             | columnar           | ~350               |
| Zn acetate                                | methanol | glacial acetic acid (0.3M) | 80             | blocked like shape | ~630               |

\* measured of surface of the film after LS-CVD using radiation thermometer.

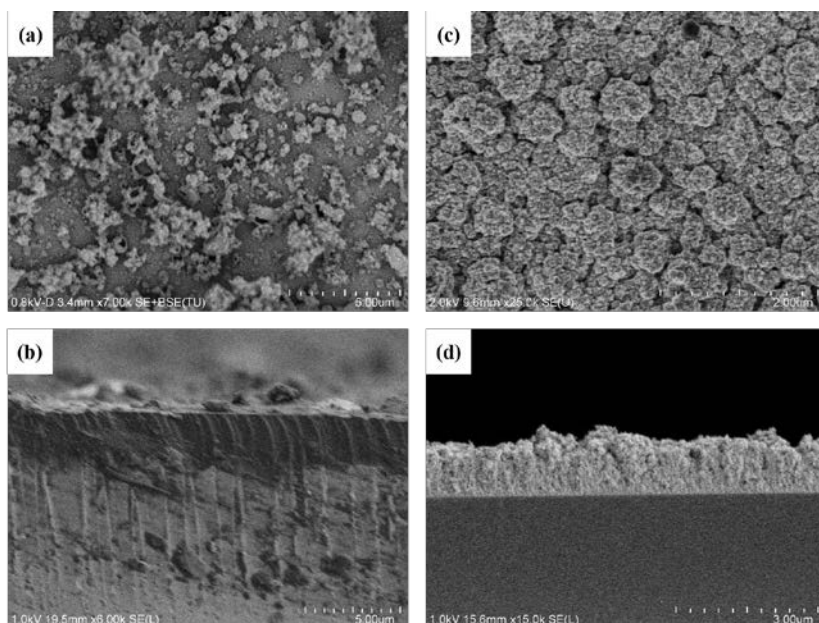

Figure S4 SEM image of surface and cross-sectional image of ZnO film by laser ES-CVD at 150 W using Zn nitrate- ethanol solution(a,b) and Zn acetylacetonate-methanol solution(c,d) laser power.

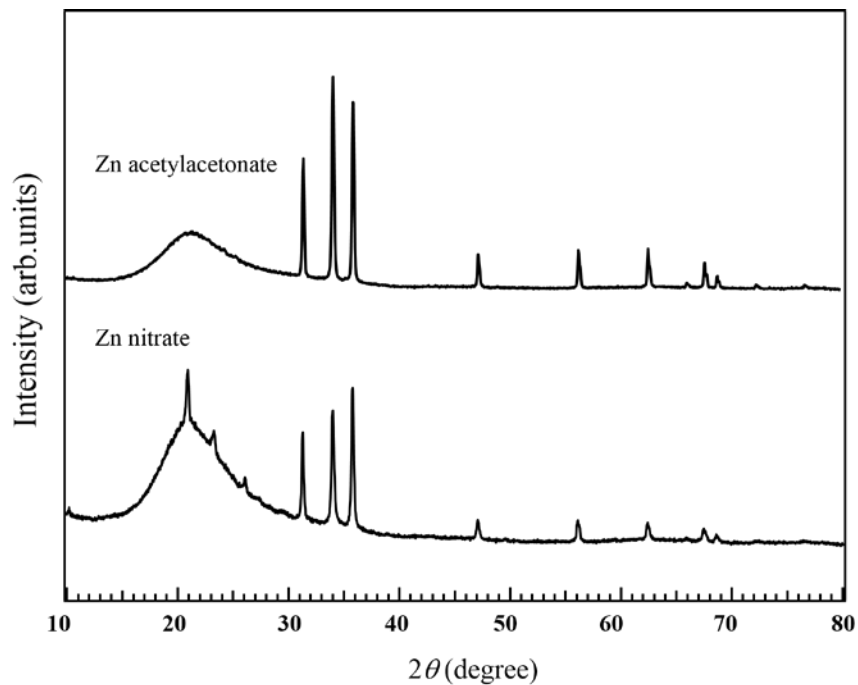

Figure S5 XRD pattern of ZnO thin films deposited by laser ES-CVD using Zn nitrate- ethanol solution and Zn acetylacetonate-methanol solution

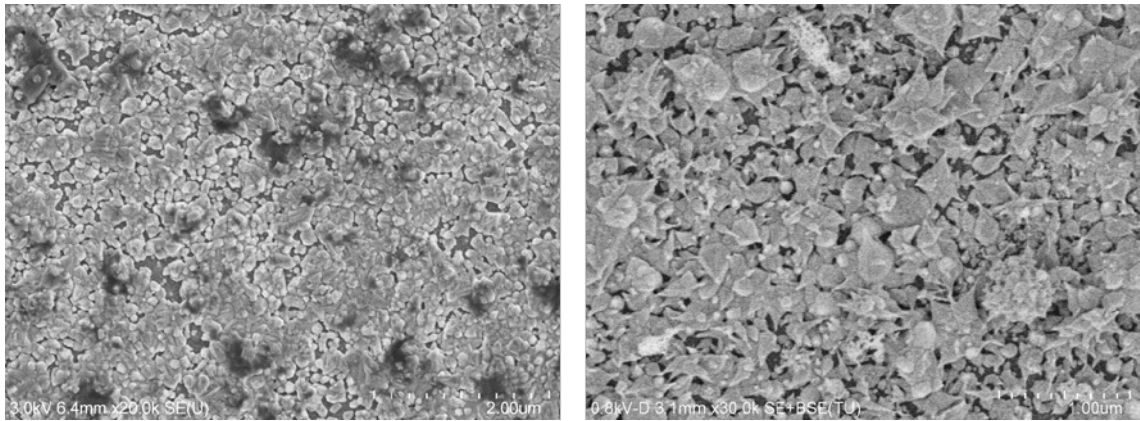

Figure S6 SEM image of surface of ZnO films deposited by laser ES-CVD at 300W
